# Supplementary material for: Transcriptional regulation by miRNA mimics that target sequences downstream of gene termini
Source: Royal Society of Chemistry journal article supplement (doi:10.1039/c1mb05090g), 2011-05-18
Supplement: c1mb05090g.pdf [file c1mb05090g.pdf]

| Oligo Name | Target      | Sequence                 |
|------------|-------------|--------------------------|
| miR-634    | PR Terminus | AACCAGCACCCCAACUUUGGAC   |
| miR-193b   | PR Terminus | AACUGGCCUCUAAAGUCCCGCU   |
| miR-1301   | PR Terminus | UUGCAGCUGCCUGGGAGUGACUUC |
| miR-1287   | PR Terminus | UGCUGGAUCAGUGGUUCGAGUC   |
| miR-1265   | PR Terminus | CAGGAUGUGGUCAAGUGUUGUU   |
| PR13580    | PR Terminus | GUUUGCCUGCAUCAGUUC dTdT  |
| PRC1       | PR mRNA     | AUGGAAGGGCAGCACAAUC dTdT |
| MM         | N/A         | UCUCUCGCGAGUCCACAGC dTdT |

**B**

| Target         | Direction | Use      | Sequence                 |
|----------------|-----------|----------|--------------------------|
| PR hnRNA       | Forward   | qPCR     | TCCTACTAGCTCCCCTTCA      |
| PR hnRNA       | Reverse   | qPCR     | TGATTGGATTTTGGGTGGTT     |
| PR promoter    | Forward   | ChIP/RIP | CCTAGAGGAGGAGGCGTTGT     |
| PR promoter    | Reverse   | ChIP/RIP | ATTGAGAATGCCACCCACA      |
| GAPDH promoter | Forward   | ChIP     | TACTAGCGGTTTTACGGGCG     |
| GAPDH promoter | Reverse   | ChIP     | TCGAACAGGAGGAGCAGAGAGCGA |

| PCR Conditions | Denature   | Annealing  | Extension  |
|----------------|------------|------------|------------|
| RT-qPCR        | 95°C, 20 s | 57°C, 30 s | 72°C, 45 s |
| ChIP-qPCR      | 95°C, 20 s | 57°C, 30 s | 72°C, 45 s |

**Supplementary Table S1.** DNA and RNA oligonucleotides used in this study. **(A)** Sequences of RNAs used in this study. All RNAs were transfected as duplexes consisting of the sequence listed and a fully complementary RNA strand. **(B)** PCR primer sequences and conditions.
